# Supplementary material for: RTP4 Enhances Corneal HSV-1 Infection in Mice With Type 2 Diabetes Mellitus
Source: PubMed Central journal article supplement — Invest Ophthalmol Vis Sci. 2024 Sep 23;65(11):36. doi: 10.1167/iovs.65.11.36 (PMC11423950; doi:10.1167/iovs.65.11.36), 2024-09-23
Supplement: iovs-65-11-36_s001.pdf [file iovs-65-11-36_s001.pdf]

## Supplementary figures

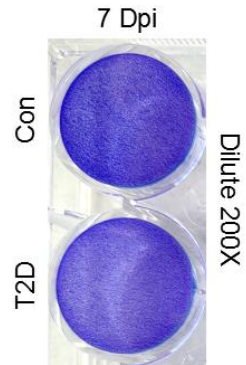

**Fig. S1** The plaque assay at 7 Dpi in control and T2D mice. The viral samples were diluted 200X.

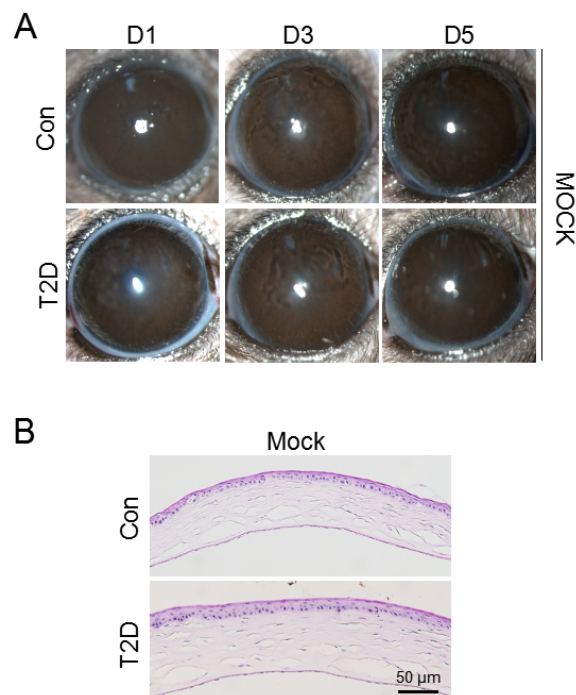

**Fig. S2** Mock treatment of corneas in control and T2D mice. (A) Slit-lamp examination of corneas. (B) H&E staining of corneal sections.

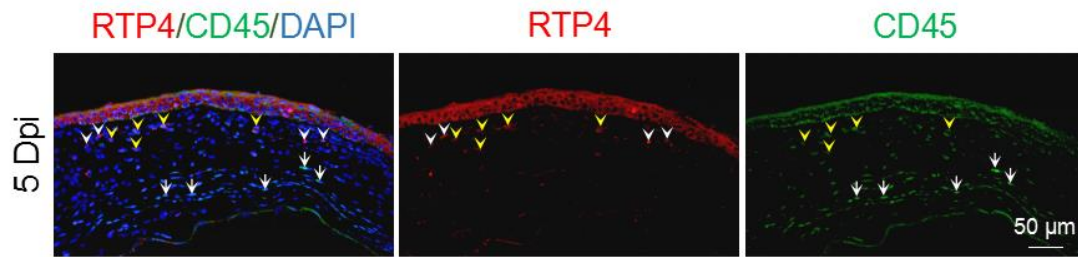

**Fig. S3 Immunofluorescence staining for RTP4 and CD45 (immune cells) at Dpi5 in control mice.** RTP4 was predominantly expressed in corneal epithelium, with some expression also detected in the corneal stroma. Additionally, it can be partially co-expressed with CD45+ cells. Yellow arrowheads indicate CD45+ RTP+ cells; White arrowheads indicate CD45- RTP+ cells; White arrows indicate CD45+ RTP- cells.
